# Supplementary material for: Associations of Body Mass Index with Demographics, Lifestyle, Food Intake, and Mental Health among Postpartum Women: A Structural Equation Approach
Source: Int J Environ Res Public Health. 2020 Jul 18;17(14):5201. doi: 10.3390/ijerph17145201 (PMC7400682; doi:10.3390/ijerph17145201)
Supplement: Supplementary file 1 [file ijerph-17-05201-s001.xlsx]

## Sheet: Sheet2
	Correlations
				BMI	Age	Education	Household Income	Job Experience	Physical Activity	Screen Time	Sleeping	Working	Smoking	Problem	Happiness	Stress
	Spearman's rho	BMI	Correlation Coefficient	1	0	.115*	.132**	-0.02	0.019	.156**	.175**	-0.002	0.083	-0.026	0.048	-0.06
			Sig. (2-tailed)	.	0.998	0.015	0.005	0.668	0.684	0.001	0	0.966	0.082	0.588	0.309	0.209
			N	443	443	443	443	443	443	443	443	443	443	443	443	443
		Age	Correlation Coefficient	0	1	0.002	0.01	0.036	0.006	.096*	0.047	-0.04	0.023	0.036	-0.003	0.024
			Sig. (2-tailed)	0.998	.	0.961	0.837	0.446	0.893	0.043	0.325	0.399	0.63	0.447	0.955	0.61
			N	443	443	443	443	443	443	443	443	443	443	443	443	443
		Education	Correlation Coefficient	.115*	0.002	1	.192**	0.091	0.04	.211**	.227**	-0.053	.107*	-0.092	-0.006	0.077
			Sig. (2-tailed)	0.015	0.961	.	0	0.055	0.402	0	0	0.261	0.025	0.054	0.903	0.105
			N	443	443	443	443	443	443	443	443	443	443	443	443	443
		Household Income	Correlation Coefficient	.132**	0.01	.192**	1	0.074	.211**	.300**	.379**	-.237**	.202**	-0.039	-0.024	-0.013
			Sig. (2-tailed)	0.005	0.837	0	.	0.119	0	0	0	0	0	0.408	0.619	0.777
			N	443	443	443	443	443	443	443	443	443	443	443	443	443
		Job Experience	Correlation Coefficient	-0.02	0.036	0.091	0.074	1	0.024	0.027	0.065	0.043	-0.08	-0.057	-0.026	0.038
			Sig. (2-tailed)	0.668	0.446	0.055	0.119	.	0.615	0.578	0.17	0.368	0.093	0.231	0.584	0.42
			N	443	443	443	443	443	443	443	443	443	443	443	443	443
		Physical Activity	Correlation Coefficient	0.019	0.006	0.04	.211**	0.024	1	.184**	.223**	-.155**	.151**	-0.016	-0.054	-0.015
			Sig. (2-tailed)	0.684	0.893	0.402	0	0.615	.	0	0	0.001	0.001	0.731	0.257	0.755
			N	443	443	443	443	443	443	443	443	443	443	443	443	443
		Screen Time	Correlation Coefficient	.156**	.096*	.211**	.300**	0.027	.184**	1	.420**	-.169**	.173**	0.039	-0.013	-0.058
			Sig. (2-tailed)	0.001	0.043	0	0	0.578	0	.	0	0	0	0.414	0.791	0.226
			N	443	443	443	443	443	443	443	443	443	443	443	443	443
		Sleeping	Correlation Coefficient	.175**	0.047	.227**	.379**	0.065	.223**	.420**	1	-.275**	.295**	-0.051	0.038	-0.052
			Sig. (2-tailed)	0	0.325	0	0	0.17	0	0	.	0	0	0.285	0.425	0.277
			N	443	443	443	443	443	443	443	443	443	443	443	443	443
		Working	Correlation Coefficient	-0.002	-0.04	-0.053	-.237**	0.043	-.155**	-.169**	-.275**	1	-.460**	-0.035	0.062	0.021
			Sig. (2-tailed)	0.966	0.399	0.261	0	0.368	0.001	0	0	.	0	0.463	0.192	0.656
			N	443	443	443	443	443	443	443	443	443	443	443	443	443
		Smoking	Correlation Coefficient	0.083	0.023	.107*	.202**	-0.08	.151**	.173**	.295**	-.460**	1	-0.03	0.021	0.006
			Sig. (2-tailed)	0.082	0.63	0.025	0	0.093	0.001	0	0	0	.	0.523	0.665	0.898
			N	443	443	443	443	443	443	443	443	443	443	443	443	443
		Problem	Correlation Coefficient	-0.026	0.036	-0.092	-0.039	-0.057	-0.016	0.039	-0.051	-0.035	-0.03	1	-0.086	0.036
			Sig. (2-tailed)	0.588	0.447	0.054	0.408	0.231	0.731	0.414	0.285	0.463	0.523	.	0.071	0.448
			N	443	443	443	443	443	443	443	443	443	443	443	443	443
		Happiness	Correlation Coefficient	0.048	-0.003	-0.006	-0.024	-0.026	-0.054	-0.013	0.038	0.062	0.021	-0.086	1	-0.063
			Sig. (2-tailed)	0.309	0.955	0.903	0.619	0.584	0.257	0.791	0.425	0.192	0.665	0.071	.	0.182
			N	443	443	443	443	443	443	443	443	443	443	443	443	443
		Stress	Correlation Coefficient	-0.06	0.024	0.077	-0.013	0.038	-0.015	-0.058	-0.052	0.021	0.006	0.036	-0.063	1
			Sig. (2-tailed)	0.209	0.61	0.105	0.777	0.42	0.755	0.226	0.277	0.656	0.898	0.448	0.182	.
			N	443	443	443	443	443	443	443	443	443	443	443	443	443
		Whole Grains consumption g/d	Correlation Coefficient	0.011	-0.015	0.006	-0.026	0.056	0	-0.041	-0.011	0.061	-0.049	-0.032	0.016	0.007
			Sig. (2-tailed)	0.812	0.746	0.9	0.585	0.239	0.994	0.385	0.811	0.201	0.308	0.497	0.735	0.889
			N	443	443	443	443	443	443	443	443	443	443	443	443	443
		Fruits consumption g/d	Correlation Coefficient	0.016	0.031	0.054	-0.009	0.02	0.004	0.065	0.008	-0.012	0.058	-0.026	0.044	-0.044
			Sig. (2-tailed)	0.74	0.521	0.259	0.85	0.679	0.927	0.172	0.874	0.806	0.221	0.583	0.358	0.36
			N	443	443	443	443	443	443	443	443	443	443	443	443	443
		Vegetables consumption g/d	Correlation Coefficient	0.027	-0.02	0.059	0.069	0.006	0.039	-0.005	-0.009	0.036	-0.015	0.027	-0.017	-0.07
			Sig. (2-tailed)	0.567	0.671	0.218	0.147	0.906	0.414	0.912	0.854	0.45	0.756	0.573	0.715	0.143
			N	443	443	443	443	443	443	443	443	443	443	443	443	443
		Sweets consumption g/d	Correlation Coefficient	0.004	-0.076	-0.013	0.079	.121*	.167**	0.005	0.059	0	0.006	0.02	-0.069	-0.066
			Sig. (2-tailed)	0.929	0.109	0.792	0.098	0.011	0	0.923	0.218	0.996	0.898	0.679	0.149	0.165
			N	443	443	443	443	443	443	443	443	443	443	443	443	443
		Chips consumption g/d	Correlation Coefficient	-0.02	-0.061	0.009	-0.072	0	0.023	-0.08	0.016	0.011	0.024	0.02	0.08	-0.056
			Sig. (2-tailed)	0.668	0.203	0.845	0.13	0.994	0.629	0.095	0.743	0.816	0.612	0.68	0.094	0.239
			N	443	443	443	443	443	443	443	443	443	443	443	443	443
		Soft Drinks consumption mL/g	Correlation Coefficient	-0.053	0.014	0.061	0.024	0.016	-0.01	0.033	0.047	-0.072	0.087	0.017	-0.019	-0.029
			Sig. (2-tailed)	0.262	0.772	0.197	0.615	0.731	0.838	0.486	0.325	0.132	0.069	0.714	0.693	0.547
			N	443	443	443	443	443	443	443	443	443	443	443	443	443
		Fast Food consumption g/d	Correlation Coefficient	-0.013	.112*	0.019	0.011	-0.033	0.045	0.08	0.07	-0.01	0.029	-0.076	0.016	-0.07
			Sig. (2-tailed)	0.778	0.018	0.688	0.817	0.482	0.35	0.092	0.142	0.831	0.547	0.109	0.731	0.14
			N	443	443	443	443	443	443	443	443	443	443	443	443	443
		Non-Processed Food consumption serve/ week	Correlation Coefficient	-0.052	0.041	-0.006	0.034	0.022	0.032	0.018	0.063	-0.033	0.087	-0.061	-0.074	0.008
			Sig. (2-tailed)	0.278	0.391	0.907	0.478	0.637	0.503	0.702	0.189	0.494	0.066	0.2	0.118	0.859
			N	443	443	443	443	443	443	443	443	443	443	443	443	443
		Processed Food consumption serve/week	Correlation Coefficient	-0.065	-0.002	0.014	0.08	0.035	0.037	.175**	0.078	0.033	-0.058	-0.034	0.04	-0.069
			Sig. (2-tailed)	0.171	0.961	0.768	0.094	0.458	0.441	0	0.101	0.485	0.225	0.47	0.405	0.147
			N	443	443	443	443	443	443	443	443	443	443	443	443	443
	Correlations
				Whole Grains consumption g/d	Fruits consumption g/d	Vegetables consumption g/d	Sweets consumption g/d	Chips consumption g/d	Soft Drinks consumption mL/g	Fast Food consumption g/d	Non-Processed Food consumption serve/ week	Processed Food consumption serve/week
	Spearman's rho	BMI	Correlation Coefficient	0.011	0.016	0.027	0.004	-0.02	-0.053	-0.013	-0.052	-0.065
			Sig. (2-tailed)	0.812	0.74	0.567	0.929	0.668	0.262	0.778	0.278	0.171
			N	443	443	443	443	443	443	443	443	443
		Age	Correlation Coefficient	-0.015	0.031	-0.02	-0.076	-0.061	0.014	.112*	0.041	-0.002
			Sig. (2-tailed)	0.746	0.521	0.671	0.109	0.203	0.772	0.018	0.391	0.961
			N	443	443	443	443	443	443	443	443	443
		Education	Correlation Coefficient	0.006	0.054	0.059	-0.013	0.009	0.061	0.019	-0.006	0.014
			Sig. (2-tailed)	0.9	0.259	0.218	0.792	0.845	0.197	0.688	0.907	0.768
			N	443	443	443	443	443	443	443	443	443
		Household Income	Correlation Coefficient	-0.026	-0.009	0.069	0.079	-0.072	0.024	0.011	0.034	0.08
			Sig. (2-tailed)	0.585	0.85	0.147	0.098	0.13	0.615	0.817	0.478	0.094
			N	443	443	443	443	443	443	443	443	443
		Job Experience	Correlation Coefficient	0.056	0.02	0.006	.121*	0	0.016	-0.033	0.022	0.035
			Sig. (2-tailed)	0.239	0.679	0.906	0.011	0.994	0.731	0.482	0.637	0.458
			N	443	443	443	443	443	443	443	443	443
		Physical Activity	Correlation Coefficient	0	0.004	0.039	.167**	0.023	-0.01	0.045	0.032	0.037
			Sig. (2-tailed)	0.994	0.927	0.414	0	0.629	0.838	0.35	0.503	0.441
			N	443	443	443	443	443	443	443	443	443
		Screen Time	Correlation Coefficient	-0.041	0.065	-0.005	0.005	-0.08	0.033	0.08	0.018	.175**
			Sig. (2-tailed)	0.385	0.172	0.912	0.923	0.095	0.486	0.092	0.702	0
			N	443	443	443	443	443	443	443	443	443
		Sleeping	Correlation Coefficient	-0.011	0.008	-0.009	0.059	0.016	0.047	0.07	0.063	0.078
			Sig. (2-tailed)	0.811	0.874	0.854	0.218	0.743	0.325	0.142	0.189	0.101
			N	443	443	443	443	443	443	443	443	443
		Working	Correlation Coefficient	0.061	-0.012	0.036	0	0.011	-0.072	-0.01	-0.033	0.033
			Sig. (2-tailed)	0.201	0.806	0.45	0.996	0.816	0.132	0.831	0.494	0.485
			N	443	443	443	443	443	443	443	443	443
		Smoking	Correlation Coefficient	-0.049	0.058	-0.015	0.006	0.024	0.087	0.029	0.087	-0.058
			Sig. (2-tailed)	0.308	0.221	0.756	0.898	0.612	0.069	0.547	0.066	0.225
			N	443	443	443	443	443	443	443	443	443
		Problem	Correlation Coefficient	-0.032	-0.026	0.027	0.02	0.02	0.017	-0.076	-0.061	-0.034
			Sig. (2-tailed)	0.497	0.583	0.573	0.679	0.68	0.714	0.109	0.2	0.47
			N	443	443	443	443	443	443	443	443	443
		Happiness	Correlation Coefficient	0.016	0.044	-0.017	-0.069	0.08	-0.019	0.016	-0.074	0.04
			Sig. (2-tailed)	0.735	0.358	0.715	0.149	0.094	0.693	0.731	0.118	0.405
			N	443	443	443	443	443	443	443	443	443
		Stress	Correlation Coefficient	0.007	-0.044	-0.07	-0.066	-0.056	-0.029	-0.07	0.008	-0.069
			Sig. (2-tailed)	0.889	0.36	0.143	0.165	0.239	0.547	0.14	0.859	0.147
			N	443	443	443	443	443	443	443	443	443
		Whole Grains consumption g/d	Correlation Coefficient	1	-0.01	-0.008	0.031	-0.067	0.031	-0.074	-0.013	-0.051
			Sig. (2-tailed)	.	0.832	0.863	0.519	0.158	0.511	0.121	0.778	0.286
			N	443	443	443	443	443	443	443	443	443
		Fruits consumption g/d	Correlation Coefficient	-0.01	1	0.013	0.03	-0.035	-0.044	0.032	0.08	.104*
			Sig. (2-tailed)	0.832	.	0.79	0.523	0.468	0.36	0.505	0.093	0.029
			N	443	443	443	443	443	443	443	443	443
		Vegetables consumption g/d	Correlation Coefficient	-0.008	0.013	1	0.014	-0.051	0.03	0.035	0.031	0.029
			Sig. (2-tailed)	0.863	0.79	.	0.776	0.283	0.525	0.466	0.518	0.543
			N	443	443	443	443	443	443	443	443	443
		Sweets consumption g/d	Correlation Coefficient	0.031	0.03	0.014	1	-0.062	-0.002	0.004	-0.018	-0.011
			Sig. (2-tailed)	0.519	0.523	0.776	.	0.191	0.97	0.941	0.703	0.817
			N	443	443	443	443	443	443	443	443	443
		Chips consumption g/d	Correlation Coefficient	-0.067	-0.035	-0.051	-0.062	1	0.008	0.002	0.014	0.013
			Sig. (2-tailed)	0.158	0.468	0.283	0.191	.	0.872	0.959	0.773	0.791
			N	443	443	443	443	443	443	443	443	443
		Soft Drinks consumption mL/g	Correlation Coefficient	0.031	-0.044	0.03	-0.002	0.008	1	0.003	0.025	-0.009
			Sig. (2-tailed)	0.511	0.36	0.525	0.97	0.872	.	0.952	0.595	0.858
			N	443	443	443	443	443	443	443	443	443
		Fast Food consumption g/d	Correlation Coefficient	-0.074	0.032	0.035	0.004	0.002	0.003	1	-0.021	0.008
			Sig. (2-tailed)	0.121	0.505	0.466	0.941	0.959	0.952	.	0.662	0.861
			N	443	443	443	443	443	443	443	443	443
		Non-Processed Food consumption serve/ week	Correlation Coefficient	-0.013	0.08	0.031	-0.018	0.014	0.025	-0.021	1	-0.053
			Sig. (2-tailed)	0.778	0.093	0.518	0.703	0.773	0.595	0.662	.	0.267
			N	443	443	443	443	443	443	443	443	443
		Processed Food consumption serve/week	Correlation Coefficient	-0.051	.104*	0.029	-0.011	0.013	-0.009	0.008	-0.053	1
			Sig. (2-tailed)	0.286	0.029	0.543	0.817	0.791	0.858	0.861	0.267	.
			N	443	443	443	443	443	443	443	443	443
